# Supplementary material
Source: Springer Nature journal article supplement (https://www.springermedizin.de/resource/supplementary/12947_2010_372_MOESM4_ESM.pdf/9556828)

V ant. sys. (cm/s)

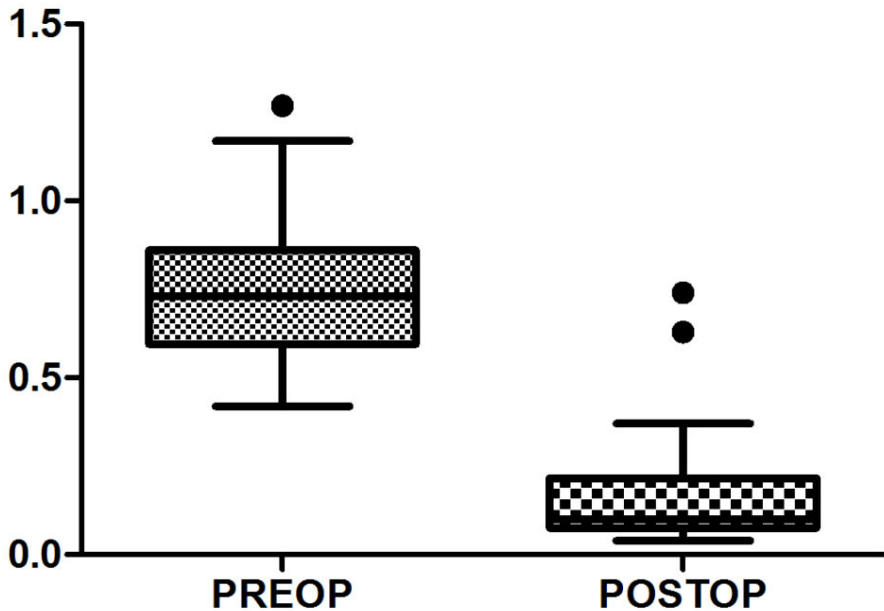

Preop: Lower 95% CI 0.66 / Upper 95% CI 0.86

Postop: Lower 95% CI 0.10 / Upper 95% CI 0.27

Supplement: MOESM4 [file 9556828]
